# Supplementary material for: Anion carriers as potential treatments for cystic fibrosis: transport in cystic fibrosis cells, and additivity to channel-targeting drugs
Source: PubMed Central journal article supplement (PMC6984391; doi:10.1039/c9sc04242c), 2019-10-02

# Anionophores: In Search of a General Treatment for Cystic Fibrosis

Cystic fibrosis (CF) is caused by dysfunction of anionic channels important for salt and water transport across epithelia

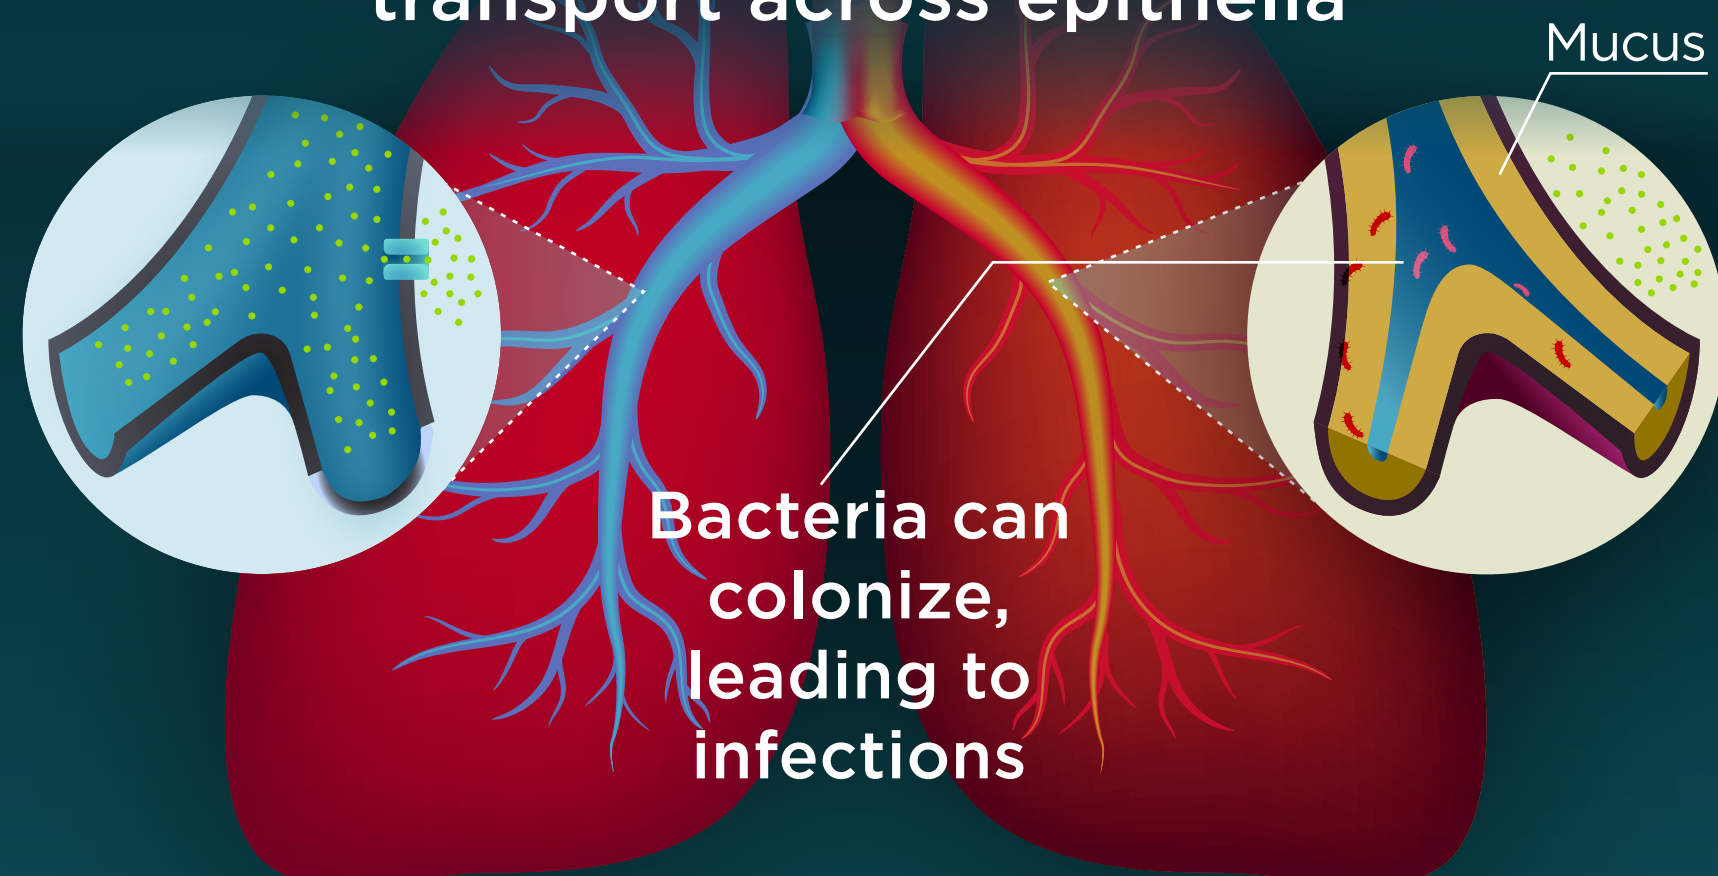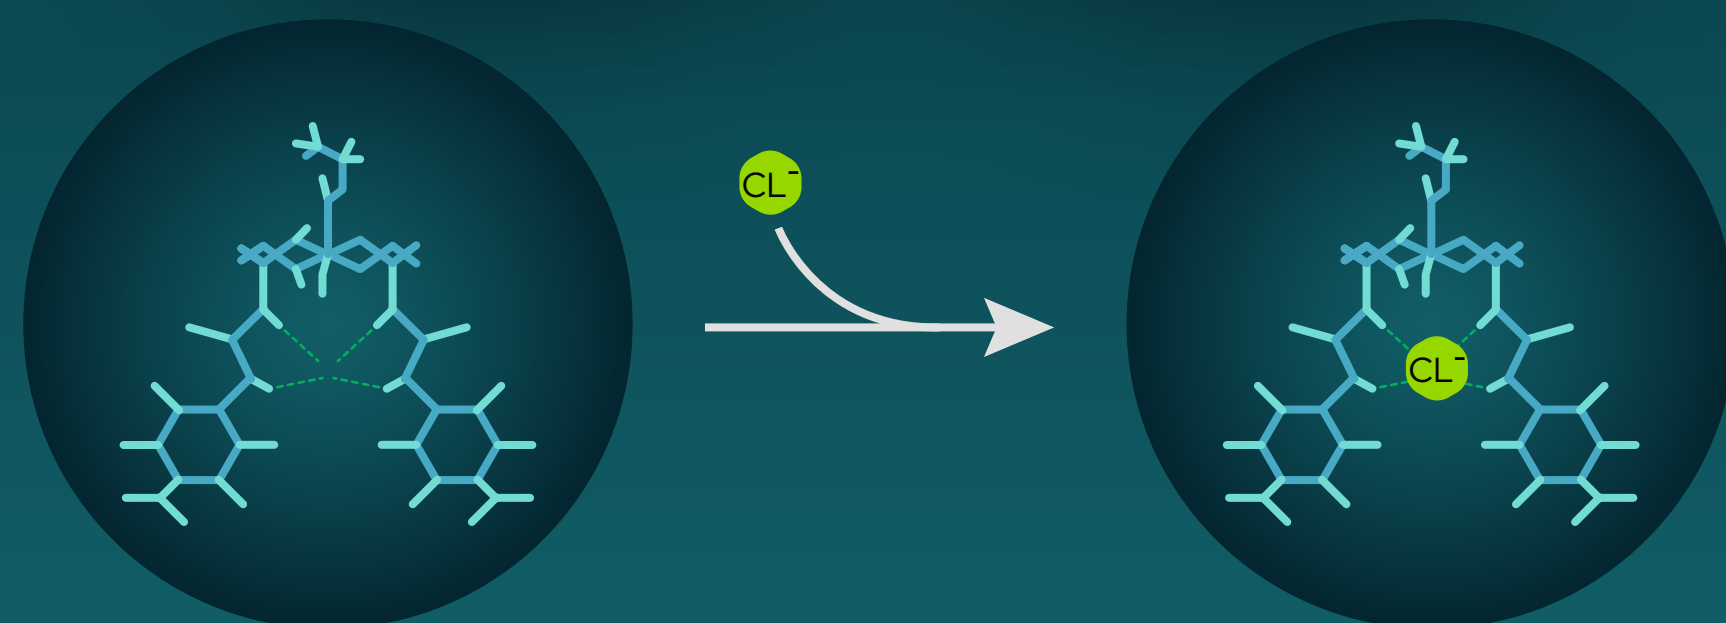

Molecules with tweezer-like structure transport anions through cystic fibrosis cell membranes

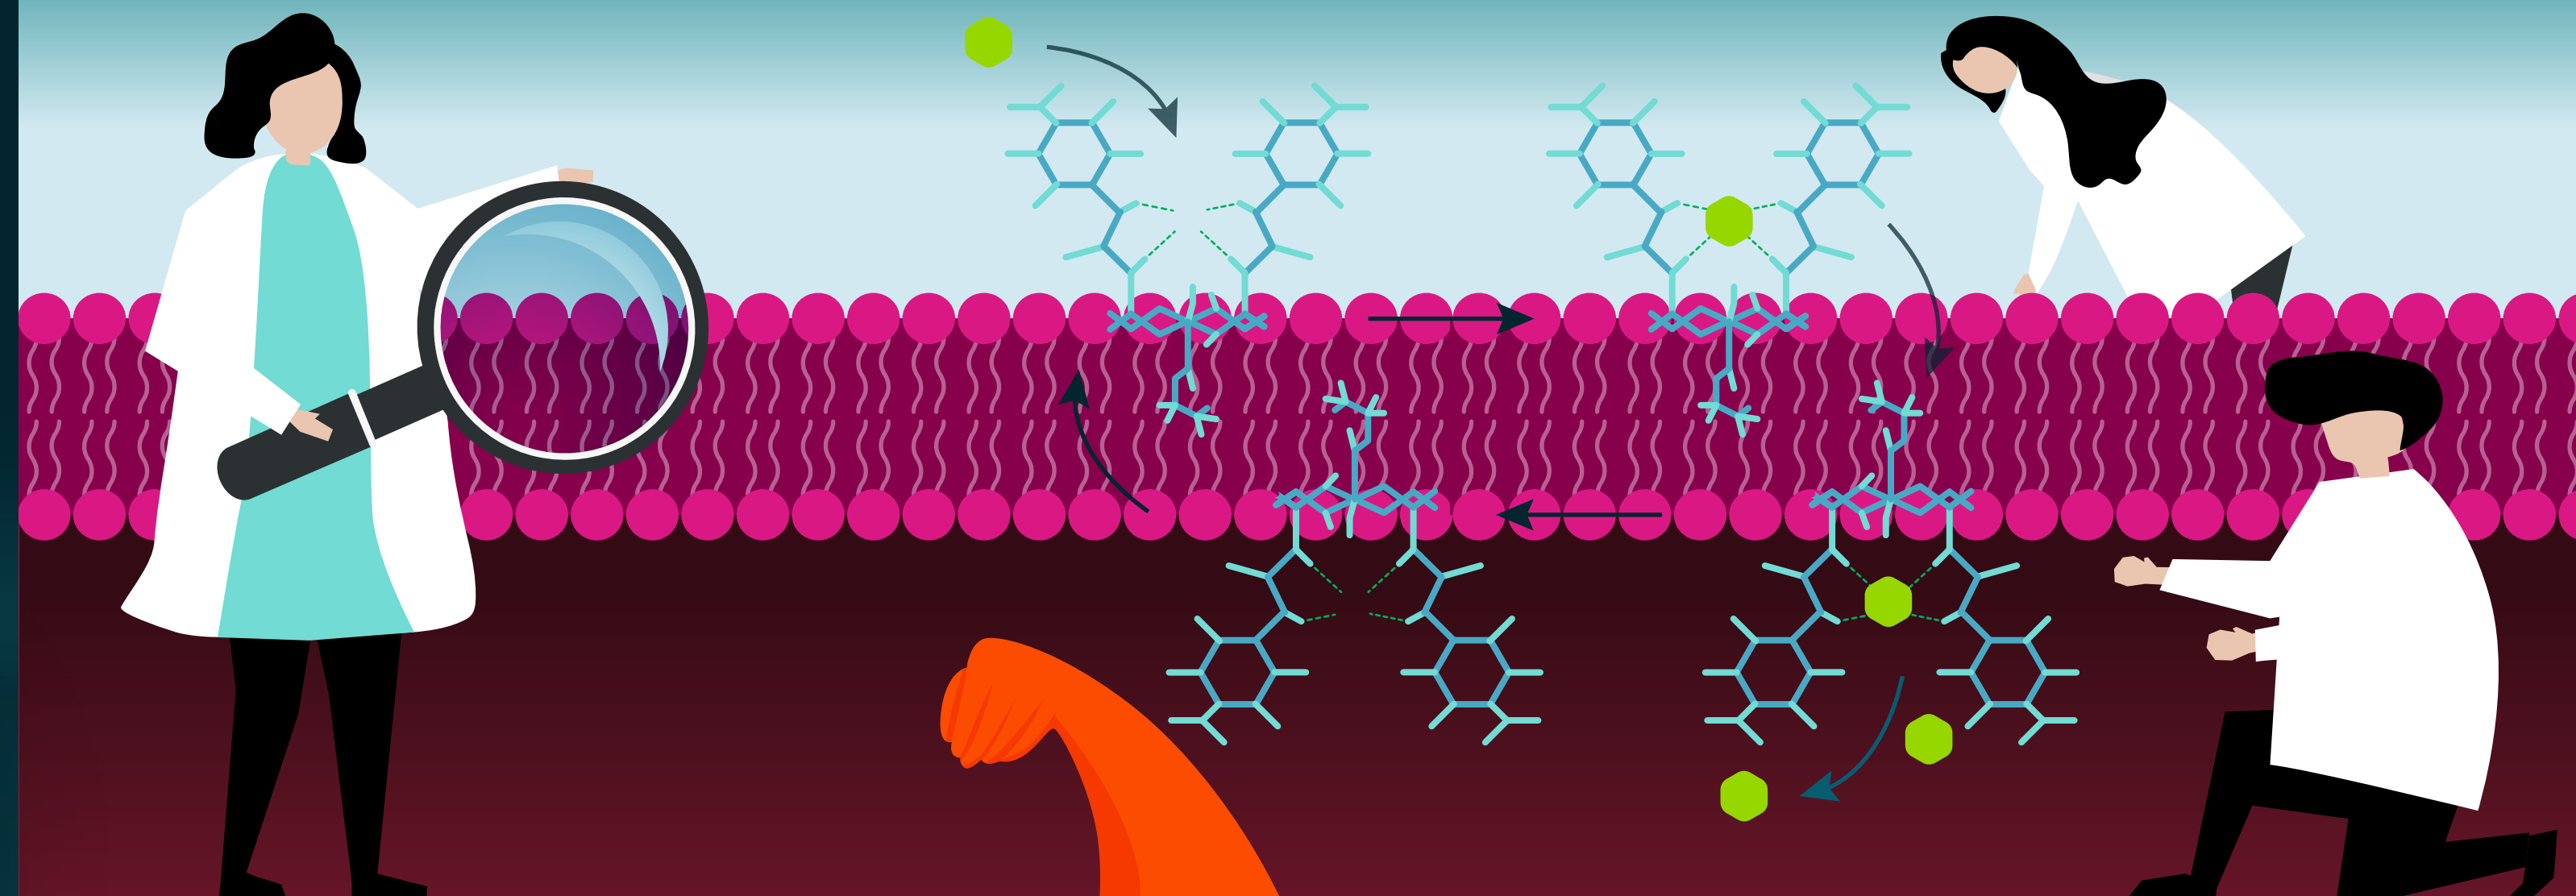

What was observed?

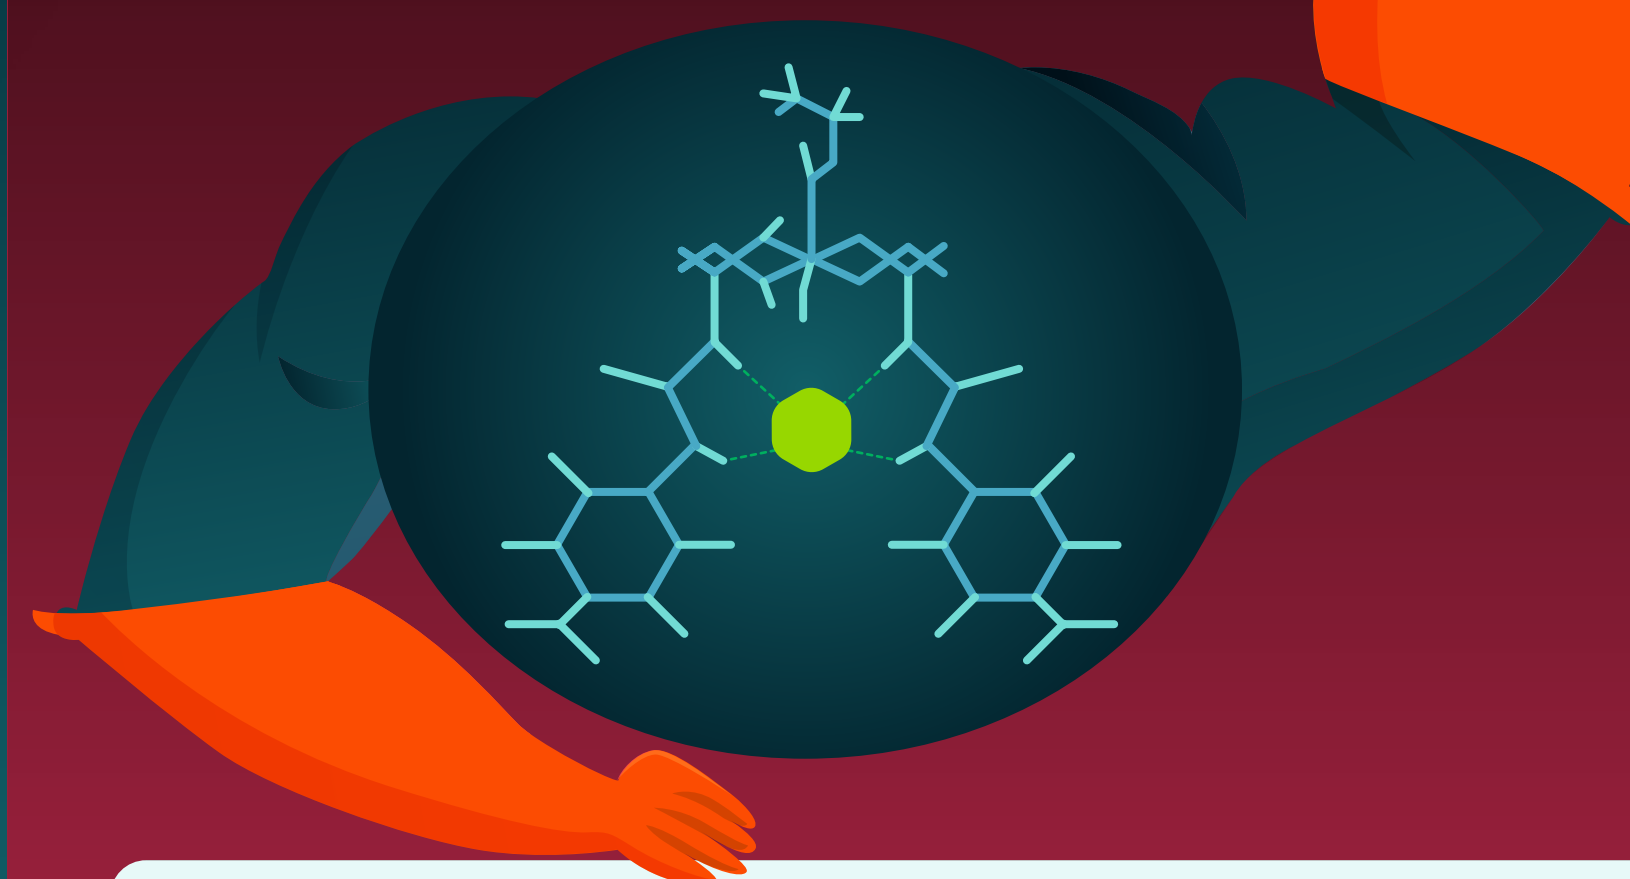

- High efficacy in combination therapy
- Cell deliverable
- Robust ion transport
- Low toxicity

By facilitating ion transport, anionophores pose as promising candidates for cystic fibrosis therapy

Can ion-carrier molecules (anionophores) that mimic the anion channel be used for CF therapy?

Chemical  
Science

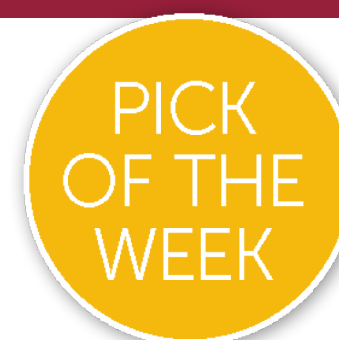

Anion carriers as potential treatments for cystic fibrosis: transport in cystic fibrosis cells, and additivity to channeltargeting drug  
Li *et al.* (2019) | DOI: 10.1039/C9SC04242C

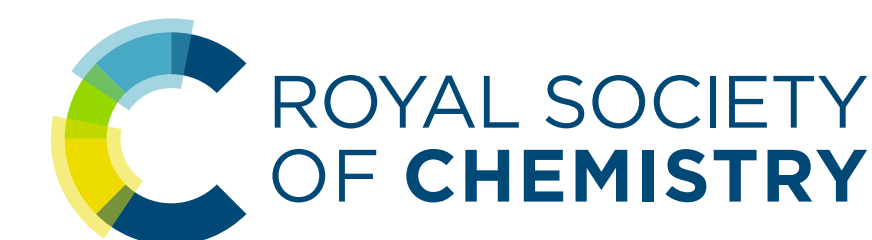

Supplement: SC-010-C9SC04242C-s002.pdf [file SC-010-C9SC04242C-s002.pdf]
